# Supplementary material for: EBV-Driven Lymphoproliferative Disorders and Lymphomas of the Gastrointestinal Tract: A Spectrum of Entities with a Common Denominator (Part 2)
Source: MDPI journal article supplement (doi:10.3390/cancers13184527), 2021-09-08
Supplement: s1 [file s1]

**Table S1.** EBV-positive Lymphoproliferative disorders.

|                 | IS                                           | HIV status                              | Sites involved                                                                       | GIT                                      | Histology                                                                | Cell of origin                                                              | EBV by EBER                                              | HHV8 | Genetic profile                                                             | Outcome                                                                                |
|-----------------|----------------------------------------------|-----------------------------------------|--------------------------------------------------------------------------------------|------------------------------------------|--------------------------------------------------------------------------|-----------------------------------------------------------------------------|----------------------------------------------------------|------|-----------------------------------------------------------------------------|----------------------------------------------------------------------------------------|
| PBL             | Mostly present                               | + often                                 | Extranodal sites mostly; nodal sites rarely                                          | Frequent (second site after oral cavity) | PBs, IBs (diffuse pattern of growth)                                     | Plasmablast (blastic B cell switched to the PC gene programme)              | + in HIV+ pts and PT pts                                 | -    | Monoclonal (IG gene rearrangement); <i>MYC</i> translocation (50% of cases) | Poor                                                                                   |
| PEL             | Mostly present                               | + (- in elderly and EBV-negative cases) | Classic PEL: serous cavities.<br>EC-PEL: nodal sites mostly; extranodal sites rarely | Rare (EC-PEL)                            | PBs, IBs (diffuse pattern of growth in EC-PEL; in fluids in classic PEL) | Post-GC cell with PB differentiation                                        | + (- in elderly HIV-negative pts)                        | +    | Monoclonal (IG genes hypermutated)                                          | Poor                                                                                   |
| BL              | Present in the immunodef associated variant  | + in the immunodef associated v.        | Extranodal sites mostly; nodal sites in the Immunodef associated v.                  | Frequent                                 | Medium-sized cells (diffuse monotonous pattern of growth)                | GC B cell                                                                   | >95% endemic v.; 20–30% sporadic v.; 25–40% immunodef v. | -    | Monoclonal (IG gene rearrangement); <i>MYC</i> translocation (90% of cases) | Highly aggressive, but potentially curable                                             |
| EBVMCU          | Mostly present (often iatrogenic)            | + rarely                                | Extranodal sites: oropharynx (most frequent), skin, GIT                              | Infrequent                               | Polymorphic infiltrate (HL-like) or monomorphic infiltrate (DLBCL-like)  | EBV-transformed post-GC B-cell                                              | +                                                        | -    | IG or TCR genes clonality in 40% of cases                                   | Mostly good (often spontaneous regression or upon removal of IS cause)                 |
| cHL             | Rarely present (frequent in MCCHL and LDCHL) | + rarely (frequent in MCCHL and LDCHL)  | Mediastinum and nodal sites                                                          | Very rare                                | Polymorphic infiltrate with HL cells and RSCs                            | GC B-cell                                                                   | + (75% MCCHL; 10–25% NSCHL)                              | -    | IG gene clonality may be present                                            | Curable in 80% of cases                                                                |
| EBV+ DLBCL, NOS | May be present (in the intestinal form)      | -                                       | Nodal (frequent in young) and extranodal sites (elderly)                             | Frequent                                 | Polymorphic or monomorphic pattern of growth                             | Mature B-cell transformed by EBV                                            | +                                                        | -    | Monoclonal (IG gene rearrangement)                                          | Poor in elderly patients and intestinal form                                           |
| HHV8+ GLPD      | Absent                                       | - (rarely +)                            | Nodal sites (mostly single lymph nodes)                                              | No                                       | PBs/IBs (single or in tiny clusters in GC)                               | GC B-cell                                                                   | +                                                        | +    | Polyclonal or oligoclonal (rarely monoclonal)                               | Mostly good                                                                            |
| LYG             | Mostly present                               | - (rarely +)                            | Extranodal sites (lungs in >90%)                                                     | Rare                                     | Polymorphic infiltrate with a variable number of EBV-positive B cells    | Mature B-cell transformed by EBV                                            | +                                                        | -    | Monoclonal (IG gene rearrangement often identified in grade 2 and 3)        | Variable from good to poor depending on grading                                        |
| CAEBV           | Absent                                       | -                                       | Extranodal, nodal sites and BM                                                       | May be involved                          | Small or medium-sized lymphocytes with mild or no atypia                 | CD4+ T cell, NK cells, cytotoxic CD8+ T cell and rarely gamma delta T cells | +                                                        | -    | TCR clonality often; rarely oligoclonality or polyclonality                 | Variable from indolent to rapidly fatal (worse outcome in T-cell type and adult-onset) |

|                                            |                                      |   |                                                          |          |                                                                                                                              |                                                      |                                  |   |                                                               |                                                                                                         |
|--------------------------------------------|--------------------------------------|---|----------------------------------------------------------|----------|------------------------------------------------------------------------------------------------------------------------------|------------------------------------------------------|----------------------------------|---|---------------------------------------------------------------|---------------------------------------------------------------------------------------------------------|
| ENKTL nasal-type                           | Rare                                 | - | Extranodal sites (upper aerodigestive tract more common) | Frequent | Polymorphic pattern; angiocentric and angiodestructive growth                                                                | Activated NK cells and more rarely cytotoxic T cells | +                                | - | TCR and IG genes mostly germ line; TCR clonality in 10–40%    | Variable                                                                                                |
| PTLPDs                                     | Present (post-transplant occurrence) | - | Extranodal and nodal sites                               | Frequent | Non-destructive PTLPDs; Polymorphic PTLD; Monomorphic PTLPDs; cHL PTLD                                                       | Variable in relation to the category of PTLPDs       | + often                          | - | Variable depending on the category                            | Variable depending on the category                                                                      |
| Systemic EBV+ T-cell lymphoma of childhood | Absent                               | - | Liver, spleen, lymph nodes, BM, skin and lungs           | Absent   | Lymphocytes usually with mild atypia (rare cases with pleomorphic cells)                                                     | Cytotoxic CD8+ T cell or activated CD4+ T cell       | +                                | - | Monoclonal (TCR gene rearrangement)                           | Poor (fulminant course usually complicated by HLH)                                                      |
| HV-like LPD                                | Absent                               | - | Skin                                                     | Absent   | Dermal and subcutaneous lymphoid infiltrate mostly with mild atypia and angiodestructive features; intraepidermal spongiosis | Skin-homing cytotoxic T cell or NK cell              | +                                | - | Monoclonal (TCR gene rearrangement in cases of T cell origin) | Indolent for years (recurrent skin lesions) before systemic involvement; high risk of systemic lymphoma |
| SMBA                                       | Absent                               | - | Skin                                                     | Absent   | Dermal and subcutaneous polymorphic infiltrate, angiodestructive features; often epidermal necrosis                          | Mature activated NK cell                             | +                                | - | Rarely monoclonal TCR gene rearrangement                      | Long course with risk of HLH, aggressive NK-cell leukemia or NK/T cell lymphoma                         |
| Aggressive NK-cell leukemia                | Absent                               | - | BM, PB, liver and spleen, but any organ may be involved  | Rare     | Often monotonous cells with round nuclei                                                                                     | Activated NK cell                                    | + mostly                         | - | TCR genes germline                                            | Fulminant course with HLH, multi-organ failure and coagulopathy                                         |
| AITL                                       | Absent                               | - | Nodal sites mostly (spleen, liver, BM and skin often)    | Rare     | Small to medium-sized monotonous cells with clear cytoplasm within inflammatory background; often HEVs and FDCs hyperplasia  | CD4+ TFH cell                                        | EBV + B cells in 80–95% of cases | - | Monoclonal (TCR gene rearrangement in 70–90% of cases)        | Poor                                                                                                    |

|                                         |                |   |                                                                                                               |          |                                                                        |                                                     |                                                                         |   |                                                   |                                                                                                           |
|-----------------------------------------|----------------|---|---------------------------------------------------------------------------------------------------------------|----------|------------------------------------------------------------------------|-----------------------------------------------------|-------------------------------------------------------------------------|---|---------------------------------------------------|-----------------------------------------------------------------------------------------------------------|
| PTCL, NOS                               | Absent         | - | Nodal sites mostly, but any site can be affected including extranodal sites                                   | Common   | Monomorphic or pleomorphic cells within inflammatory background        | Activated mature T cell of CD4+ central memory type | EBV + (more often in background B cells and rarely in neoplastic cells) | - | Monoclonal (TCR gene rearrangement)               | Poor                                                                                                      |
| FTCL                                    | Absent         | - | Nodal sites mostly                                                                                            | Rare     | Medium-sized monotonous cells; follicular pattern or PTGC-like pattern | TFH                                                 | EBV+ B cells                                                            | - | Monoclonal (TCR gene rearrangement)               | Poor                                                                                                      |
| CI-DLBCL                                | Absent         | - | Body cavities (often thoracic cavity); mass-forming lesion in longstanding CI                                 | Absent   | Sheets of large cells (IBs or CBs)                                     | EBV-transformed post-GC B cell                      | +                                                                       | - | Monoclonal (IG genes rearranged and hypermutated) | Poor                                                                                                      |
| FA-DLBCL                                | Absent         | - | Developing within pseudocysts, fibrin thrombi, cardiac myxoma, prosthesis, hematomas; <u>not</u> mass-forming | Absent   | Single or tiny clusters of large cells within fibrin                   | EBV-transformed post-GC B cell                      | +                                                                       | - | Monoclonal (IG genes rearranged and hypermutated) | Favorable even with surgery alone (mostly)                                                                |
| Lymphopr. diseases associated with PIDs | Present (PIDs) | - | Extranodal sites mostly (GIT, lungs, CNS)                                                                     | Frequent | Reactive hyperplasia; polymorphous lymphoid infiltrate; frank lymphoma | B-cell origin in most lymphomas                     | +                                                                       | - | Polyclonal, oligoclonal or monoclonal             | Variable, depending on type of PIDs (CVID may be indolent; ALPS often self-limited ;most LPDs aggressive) |

AITL: angioimmunoblastic T-cell lymphoma; ALPS: autoimmune lymphoproliferative syndrome; BL: Burkitt lymphoma; BM: bone marrow; CAEBV: chronic active EBV infection; CBs: centroblasts; cHL: classic Hodgkin lymphoma; CI: chronic inflammation; CI-DLBCL: diffuse large B-cell lymphoma associated with chronic inflammation; CNS: central nervous system; CVID: common variable immunodeficiency; DLBCL: diffuse large B-cell lymphoma; EBER: in situ hybridization for EBV-encoded RNA; EBV: Epstein-Barr virus; EBV+ DLBCL, NOS: EBV-positive, diffuse large B-cell lymphoma, not otherwise specified; EBVMCU: EBV-positive mucocutaneous ulcer; EC-PEL: extra-cavitary primary effusion lymphoma; ENKTL, nasal type: extranodal NK/T-cell lymphoma; FA-DLBCL: fibrin-associated diffuse large B-cell lymphoma; FDCs: follicular dendritic cells; FTCL: follicular T-cell lymphoma; GC: germinal centre; GIT: gastrointestinal tract; HHV8: Human herpes virus 8; HHV8+ GLPD: HHV8-positive germinotropic lymphoproliferative disorder; HEVs: high endothelial venules; HIV: human immunodeficiency virus; HL: Hodgkin lymphoma; HLH: hemophagocytic lymphohistiocytosis; HV-like LPD: Hydroa vacciniforme-like lymphoproliferative disorder; IBs: immunoblasts; Immunodef: immunodeficiency; IG immunoglobulin; IS: immunosuppression; LDCHL: lymphocyte-depleted classic Hodgkin lymphoma; LPDs: lymphoproliferative disorders; LYG: lymphomatoid granulomatosis; Lymphopr: lymphoproliferative; MCCHL: mixed cellularity classic Hodgkin lymphoma; NSCHL: nodular sclerosis classic Hodgkin lymphoma; PBL: plasmablastic lymphoma; PB: peripheral blood; PBs: plasmablasts; PC: plasma cell; PEL: primary effusion lymphoma; Post-GC: post-germinal centre; PT: post-transplant; PTGC: progressively transformed germinal centre; PTLs: post-transplant lymphoproliferative disorders; pts: patients; RSCs: Reed Sternberg cells; SMBA: severe mosquito bite allergy; TCR: T-cell receptor; v: variant; TFH: T-follicular helper; **Note:** PBL, EC-PEL and BL are discussed in the current part 2 of the review.
